# Supplementary material for: Immobilization of ferrocene and its derivatives within metal–organic frameworks with high loadings toward efficient oxygen evolution reaction
Source: Royal Society of Chemistry journal article supplement (doi:10.1039/d3dt02763e), 2024-01-01
Supplement: d3dt02763e1.pdf [file d3dt02763e1.pdf]

*Electronic Supplementary Information (ESI)*

**Immobilization of Ferrocene and Its Derivatives within Metal-Organic Frameworks with High Loadings toward Efficient Oxygen Evolution Reaction**

Shulin Li,<sup>‡b</sup> Xiangyang Shangguan,<sup>‡a</sup> Zhaoxin Zhou,<sup>b</sup> Wenyue Niu,<sup>a</sup> Yajing Zhang,<sup>a</sup>

Xiaonan Wang,<sup>a</sup> He Zhu,<sup>b</sup> Guoguo Liu,<sup>a</sup> Kangjun Wang<sup>a,\*</sup> and Guangli Yu<sup>a,\*</sup>

<sup>a</sup> College of Chemical Engineering, Shenyang University of Chemical Technology, Shenyang

110142, P. R. China. *E-mail:* [yugl0507@163.com](mailto:yugl0507@163.com), [wangkj\\_dut@syuct.edu.cn](mailto:wangkj_dut@syuct.edu.cn)

<sup>b</sup> School of Science and Engineering, The Chinese University of Hong Kong, Shenzhen 518172, P.

R. China

<sup>‡</sup> These authors should be considered as co-first authors.

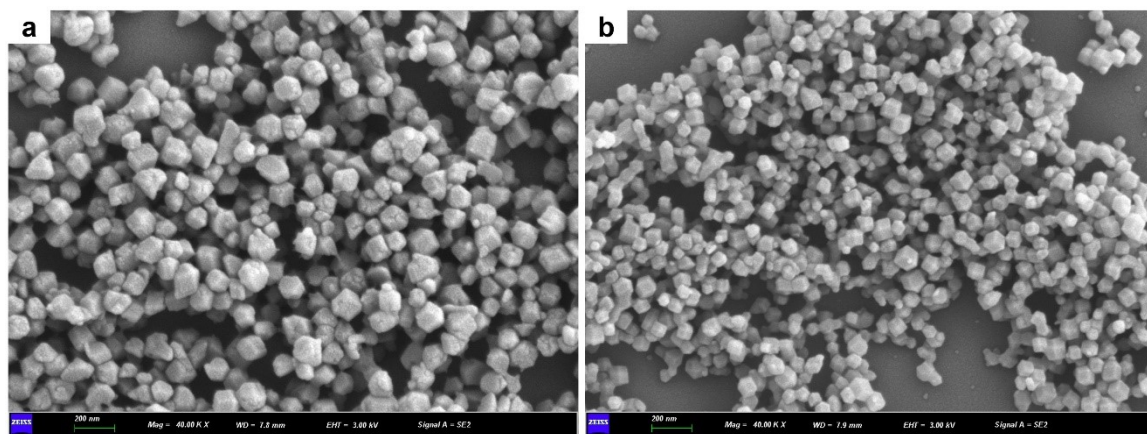

**Fig. S1** SEM images of ZIF-8 (a) and Fc/ZIF-8-2:1 (b).

**Table S1** Pore structure of ZIF-8 and Fc/ZIF-8-2:1.

| Sample       | $S_{\text{BET}}$<br>( $\text{m}^2 \text{g}^{-1}$ ) <sup>a</sup> | $S_{\text{micro}}$<br>( $\text{m}^2 \text{g}^{-1}$ ) <sup>b</sup> | $V_{\text{total}}$<br>( $\text{cm}^3 \text{g}^{-1}$ ) <sup>c</sup> | $V_{\text{micro}}$<br>( $\text{cm}^3 \text{g}^{-1}$ ) <sup>d</sup> |
|--------------|-----------------------------------------------------------------|-------------------------------------------------------------------|--------------------------------------------------------------------|--------------------------------------------------------------------|
| ZIF-8        | 1785.5                                                          | 1672.2                                                            | 1.75                                                               | 0.62                                                               |
| Fc/ZIF-8-2:1 | 938.9                                                           | 770.7                                                             | 1.09                                                               | 0.38                                                               |

<sup>a</sup> Brunauer-Emmett-Teller (BET) surface area estimated at  $P/P_0 = 0.005-0.05$ , <sup>b</sup> microporous surface area determined by  $t$ -plot method at  $P/P_0 = 0.4-0.6$ , <sup>c</sup> total pore volume calculated at  $P/P_0 = 0.995$ , <sup>d</sup> micropore volume determined by  $t$ -plot method.

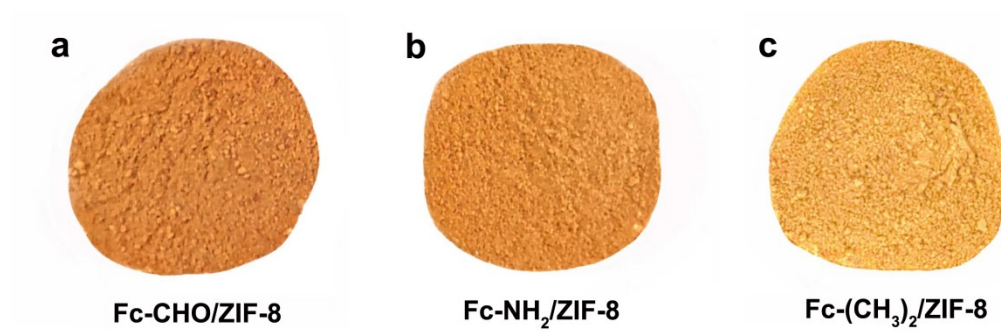

**Fig. S2** Optical photos of Fc-CHO/ZIF-8 (a), Fc-NH<sub>2</sub>/ZIF-8 (b) and Fc-(CH<sub>3</sub>)<sub>2</sub>/ZIF-8 (c).

**Table S2** Content of Fe determined by ICP-AES in Fc-CHO/ZIF-8, Fc-NH<sub>2</sub>/ZIF-8 and Fc-(CH<sub>3</sub>)<sub>2</sub>/ZIF-8 composites.

| Sample                                    | Fe (%) |
|-------------------------------------------|--------|
| Fc-CHO/ZIF-8                              | 3.6%   |
| Fc-NH <sub>2</sub> /ZIF-8                 | 3.5%   |
| Fc-(CH <sub>3</sub> ) <sub>2</sub> /ZIF-8 | 3.9%   |

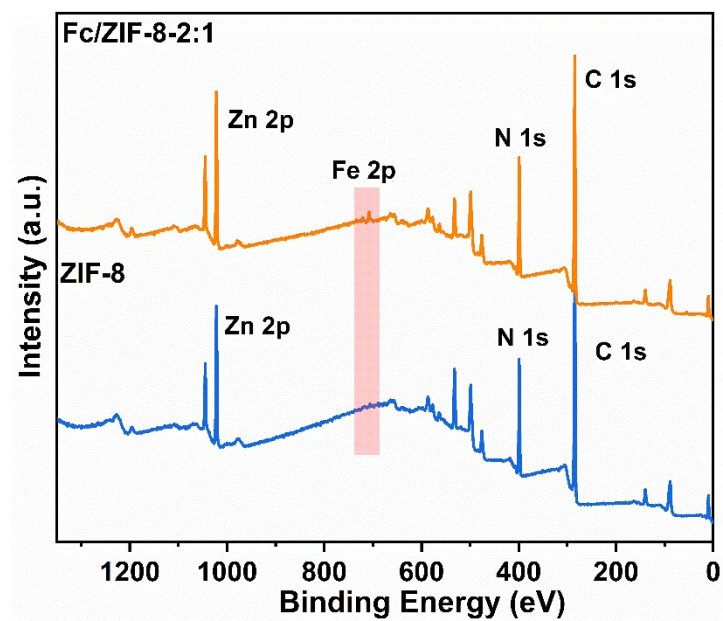

Fig. S3 XPS survey spectra of Fc/ZIF-8-2:1 and ZIF-8.

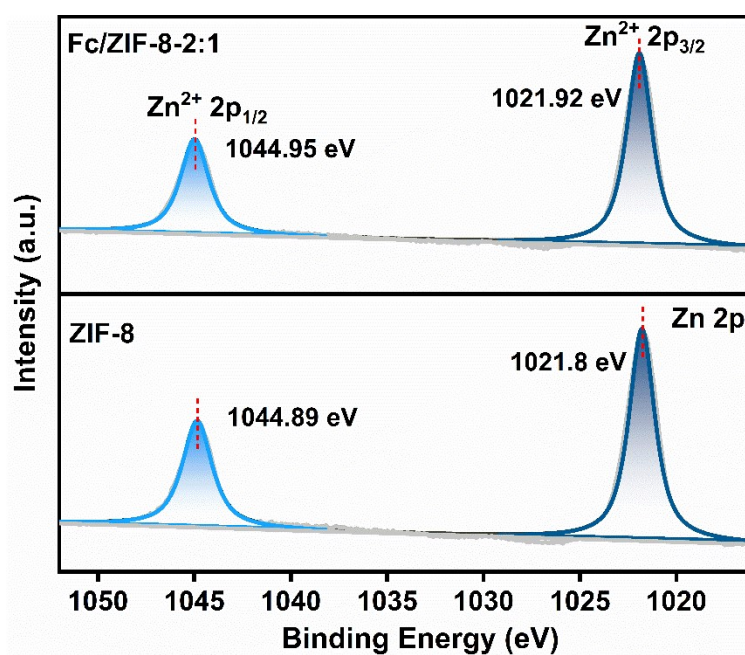

Fig. S4 High-resolution XPS spectra of Zn 2p in pristine Fc/ZIF-8-2:1 and ZIF-8.

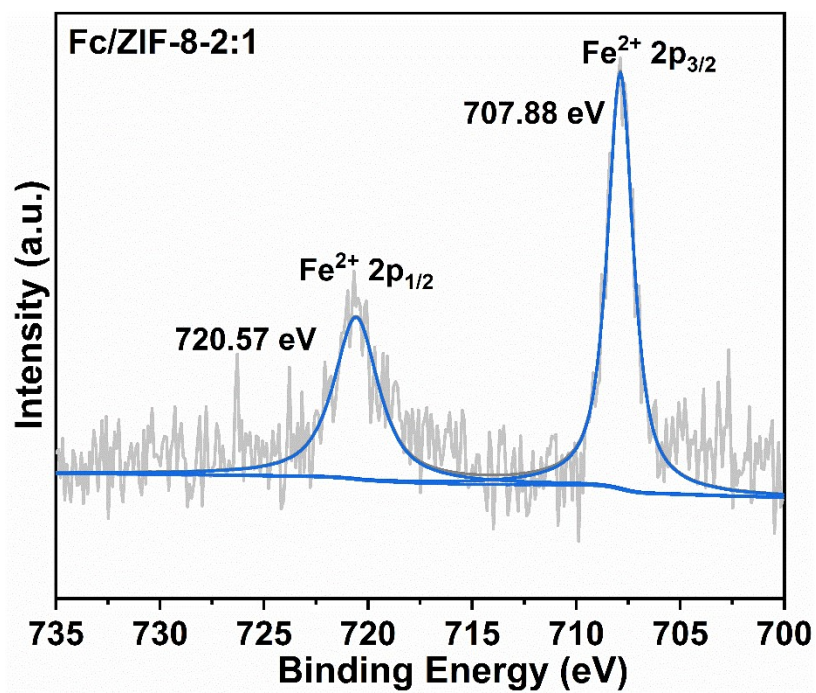

**Fig. S5** High-resolution XPS spectra of Fe 2p in pristine Fc/ZIF-8-2:1.

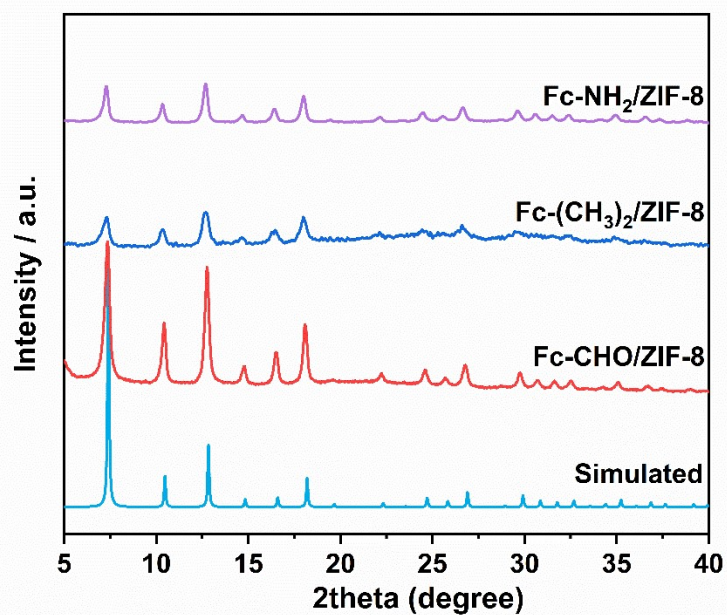

**Fig. S6** XRD patterns of simulated ZIF-8, Fc-CHO/ZIF-8, Fc-(CH<sub>3</sub>)<sub>2</sub>/ZIF-8 and Fc-NH<sub>2</sub>/ZIF-8.

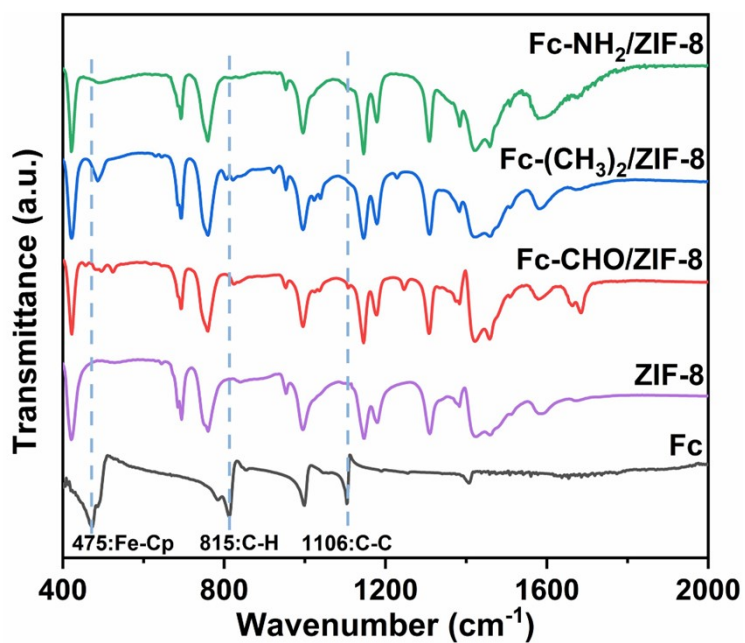

**Fig. S7** FT-IR spectra of Fc, ZIF-8, Fc-CHO/ZIF-8, Fc-(CH<sub>3</sub>)<sub>2</sub>/ZIF-8 and Fc-NH<sub>2</sub>/ZIF-8.

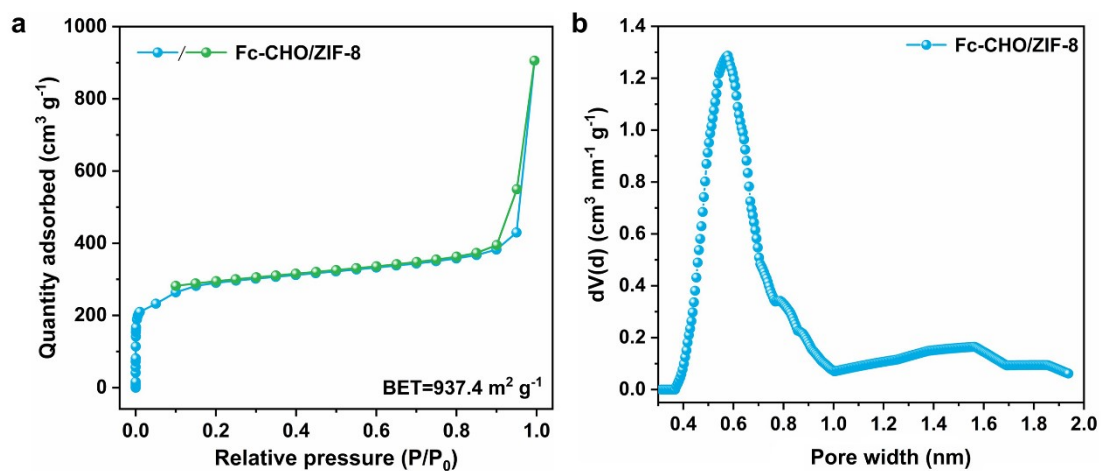

**Fig. S8**  $\text{N}_2$  adsorption-desorption isotherms (a) and the pore size distribution using the Horvath-Kawazoe model (b) of Fc-CHO/ZIF-8.

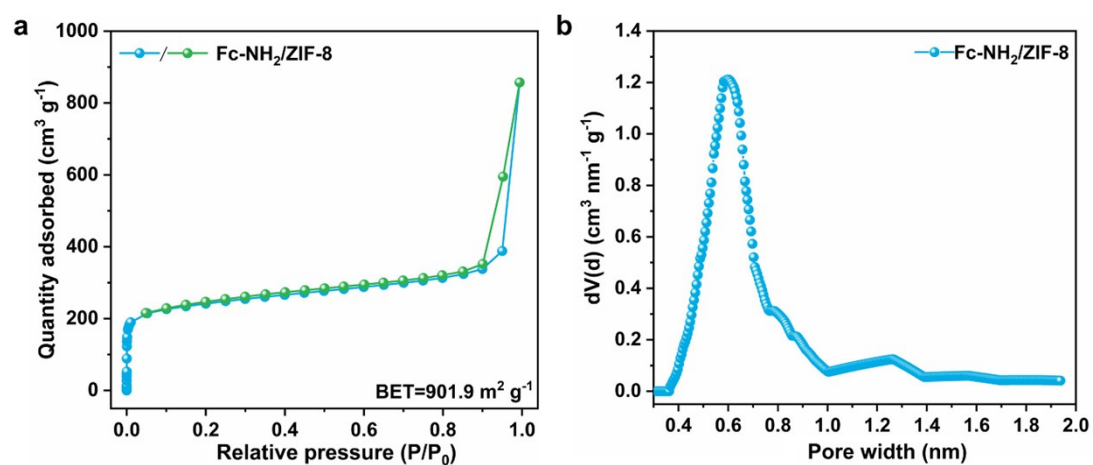

**Fig. S9**  $\text{N}_2$  adsorption-desorption isotherms (a) and the pore size distribution using the Horvath-Kawazoe model (b) of Fc-NH<sub>2</sub>/ZIF-8.

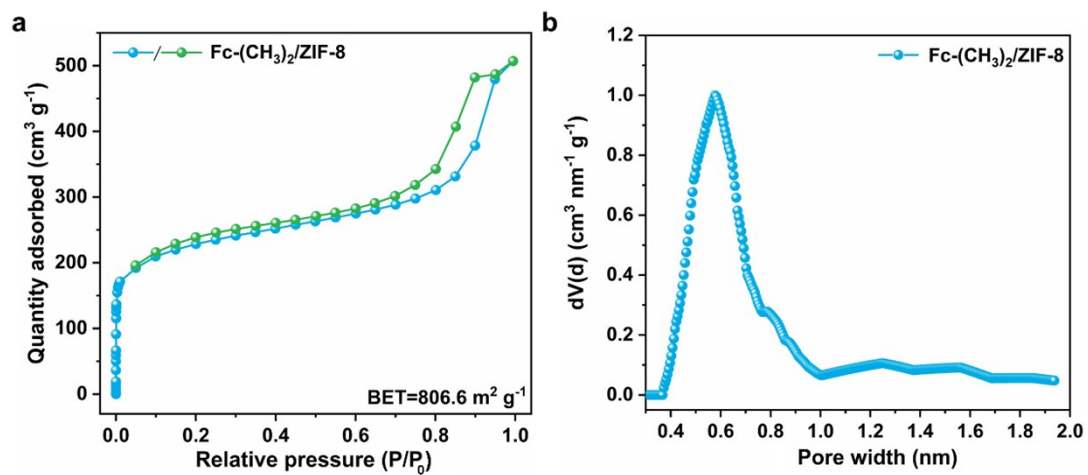

**Fig. S10** N<sub>2</sub> adsorption-desorption isotherms (a) and the pore size distribution using the Horvath-Kawazoe model (b) of Fc-(CH<sub>3</sub>)<sub>2</sub>/ZIF-8.



**Table S3** OER performances for this work and reported Fe/Co/Ni-based OER catalysts under alkaline conditions.

|                                                      | <b>Overpotential<br/>(mV) at 10 mA cm<sup>-2</sup></b> | <b>Tafel slope<br/>(mV dec<sup>-1</sup>)</b> | <b>References</b> |
|------------------------------------------------------|--------------------------------------------------------|----------------------------------------------|-------------------|
| <b><i>Fc/ZIF-8</i></b>                               | 246                                                    | 52                                           | This Work         |
| <b><i>Fc-CHO/ZIF-8</i></b>                           | 238                                                    | 44.4                                         | This Work         |
| <b><i>BMM-10-Fe-H</i></b>                            | 260                                                    | 137.4                                        | 1                 |
| <b><i>NiFe-MOF NSs</i></b>                           | 240                                                    | 73.44                                        | 2                 |
| <b><i>G-FeNi-Co-ZIF-L/NF</i></b>                     | 248                                                    | 49.5                                         | 3                 |
| <b><i>Fe-Ni MOF NSs/NF</i></b>                       | 258                                                    | 40.8                                         | 4                 |
| <b><i>Co<sub>3</sub>(HITP)</i></b>                   | 254                                                    | 86.5                                         | 5                 |
| <b><i>NiCoFeP</i></b>                                | 273                                                    | 35                                           | 6                 |
| <b><i>CoFe-MOF-NK</i></b>                            | 268                                                    | 77.5                                         | 7                 |
| <b><i>MCCF/NiMn-MOFs</i></b>                         | 280                                                    | 86                                           | 8                 |
| <b><i>CoNi1@C</i></b>                                | 276                                                    | 55.6                                         | 9                 |
| <b><i>CoCu-MOF</i></b>                               | 271                                                    | 63.5                                         | 10                |
| <b><i>Ni-Co LDH@ZIF-67-<br/>V<sub>o</sub>/NF</i></b> | 290                                                    | 58                                           | 11                |
| <b><i>CoFeMOF</i></b>                                | 265                                                    | 44                                           | 12                |
| <b><i>β<sup>0</sup>-type Co-MOF</i></b>              | 361                                                    | 28                                           | 13                |
| <b><i>Ni@NC</i></b>                                  | 280                                                    | 46                                           | 14                |
| <b><i>NiFc-MOF</i></b>                               | 195                                                    | 44.1                                         | 15                |
| <b><i>FeTAPP-NiTCPP-POP</i></b>                      | 338                                                    | 52                                           | 16                |
| <b><i>Co porphyrins 1/CNTs</i></b>                   | 407                                                    | 60.3                                         | 17                |

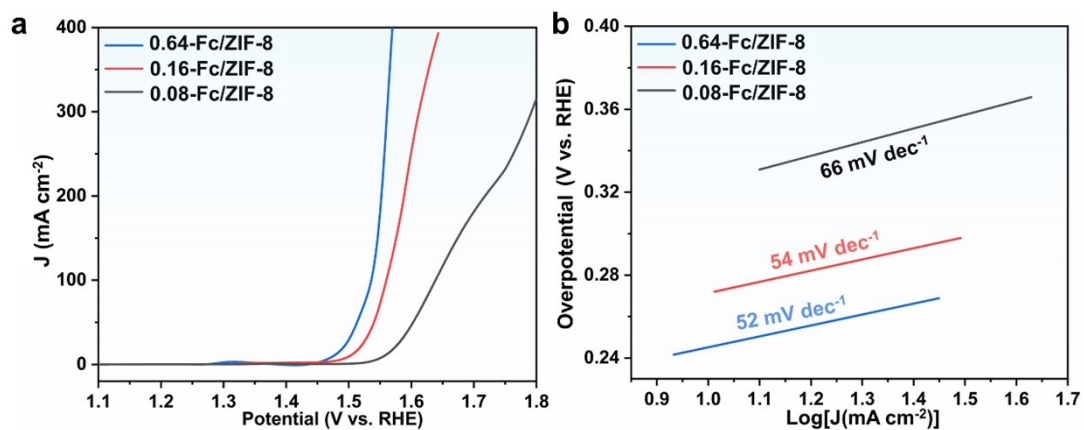

**Fig. S11** LSV curves (a) and corresponding Tafel slopes (b) of Fc/ZIF-8 with different Fc loading.

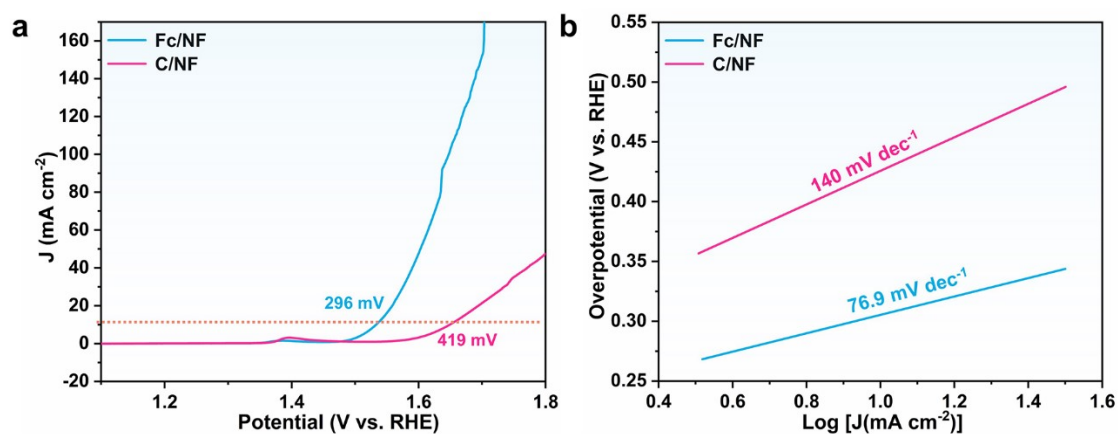

**Fig. S12** LSV curves (a) and corresponding Tafel slopes (b) of Fc/NF and C/NF.

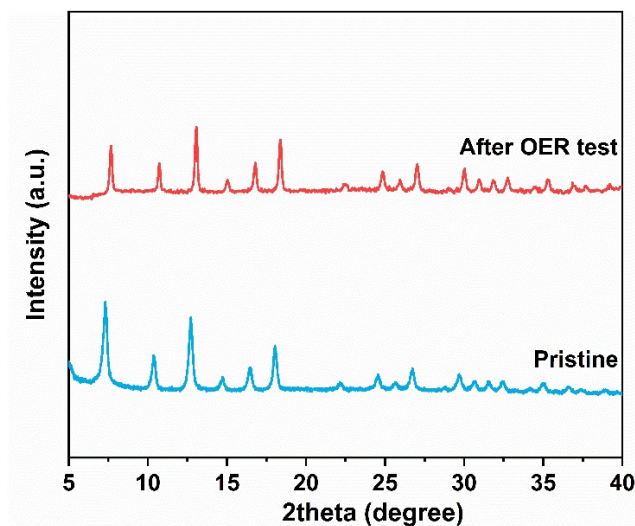

**Fig. S13** XRD patterns of of Fc/ZIF-8 before and after OER test.

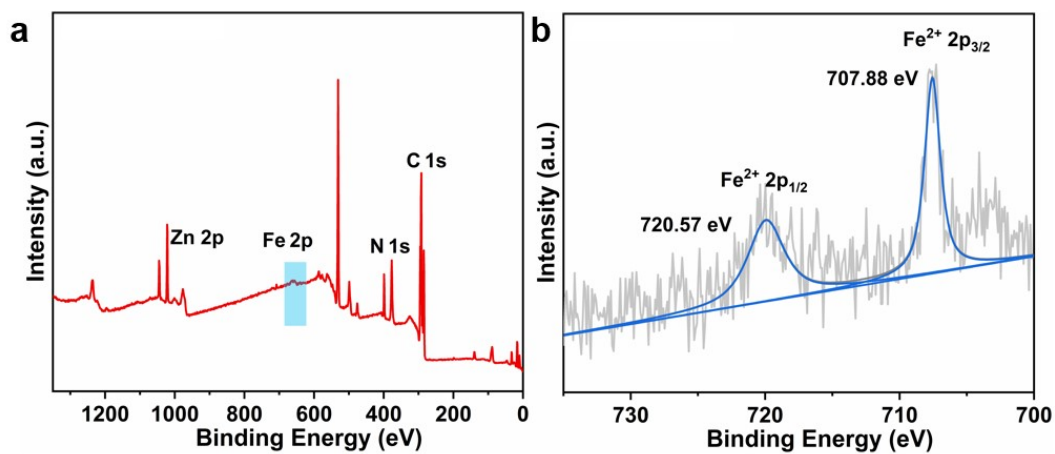

**Fig. S14** XPS survey spectra (a) and Fe 2p (b) of Fc/ZIF-8-2:1 after OER test.

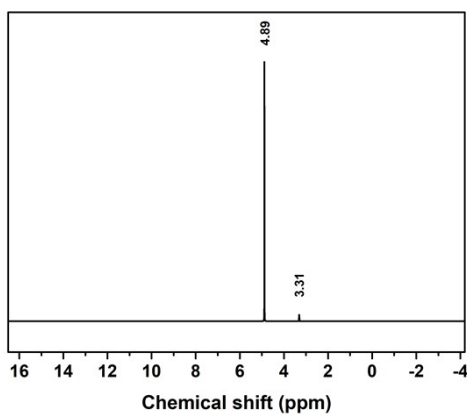

**Fig. S15**  $^1\text{H}$  NMR spectra of the electrolyte solution in methanol- $\text{d}_4$  reagent.

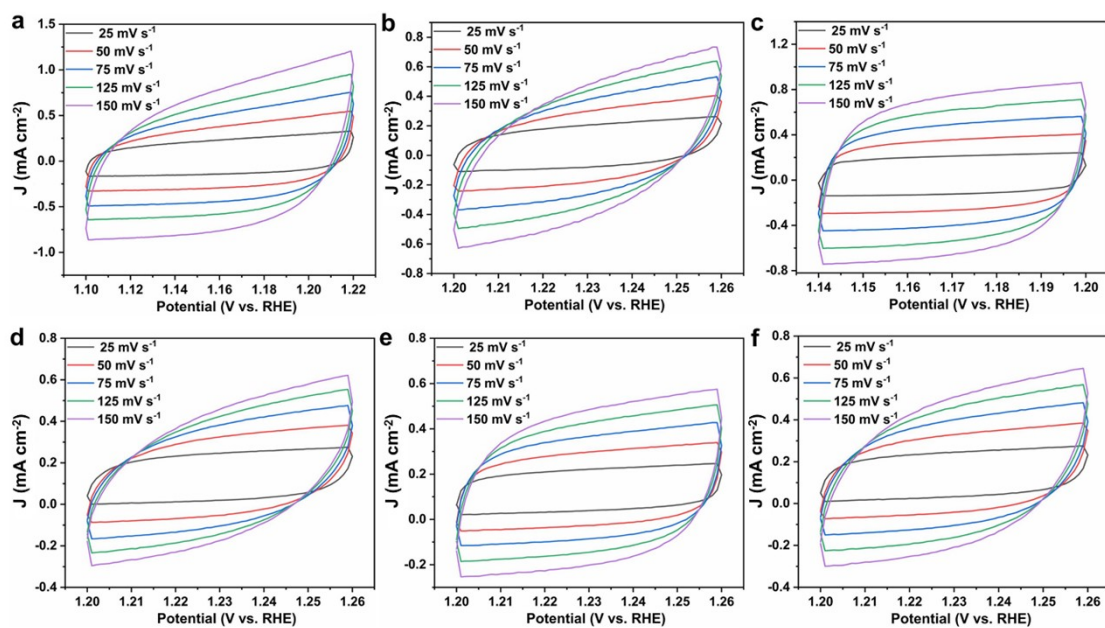

**Fig. S16** CV curves measured at different scan rates of Fc/ZIF-8-0:1 (a), Fc/ZIF-8-1:1 (b), Fc/ZIF-8-2:1 (c), Fc/ZIF-8-3:1 (d), Fc/ZIF-8-4:1 (e) and ZIF-8 (f).

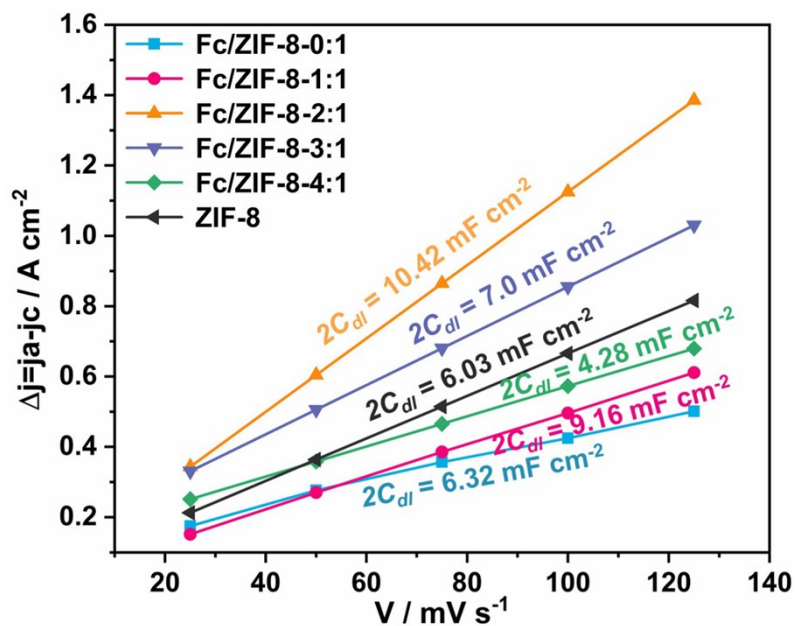

**Fig. S17**  $C_{dl}$  values of Fc/ZIF-8-0:1, Fc/ZIF-8-1:1, Fc/ZIF-8-2:1, Fc/ZIF-8-3:1, Fc/ZIF-8-4:1 and ZIF-8.

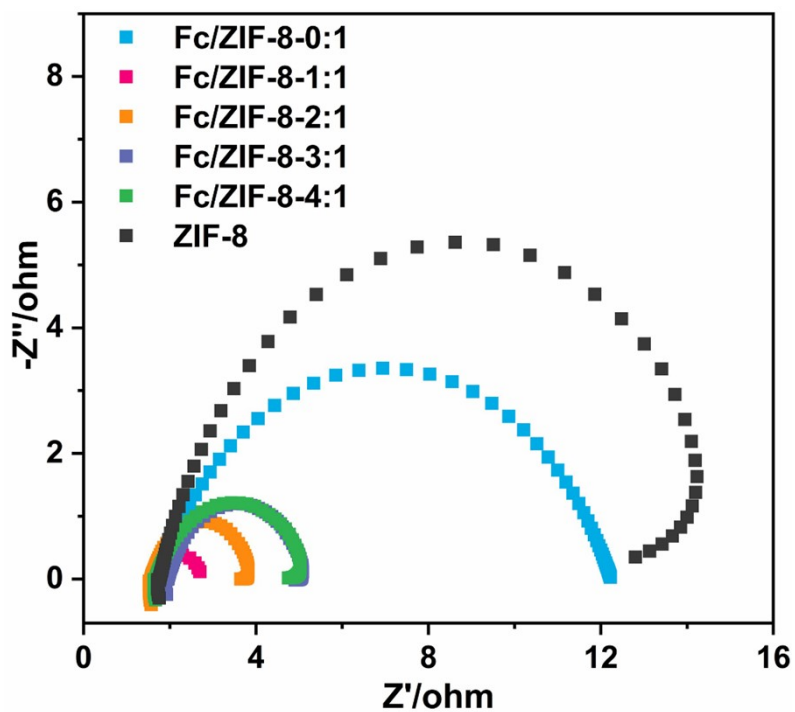

**Fig. S18** Nyquist plots of Fc/ZIF-8-0:1, Fc/ZIF-8-1:1, Fc/ZIF-8-2:1, Fc/ZIF-8-3:1, Fc/ZIF-8-4:1 and ZIF-8.

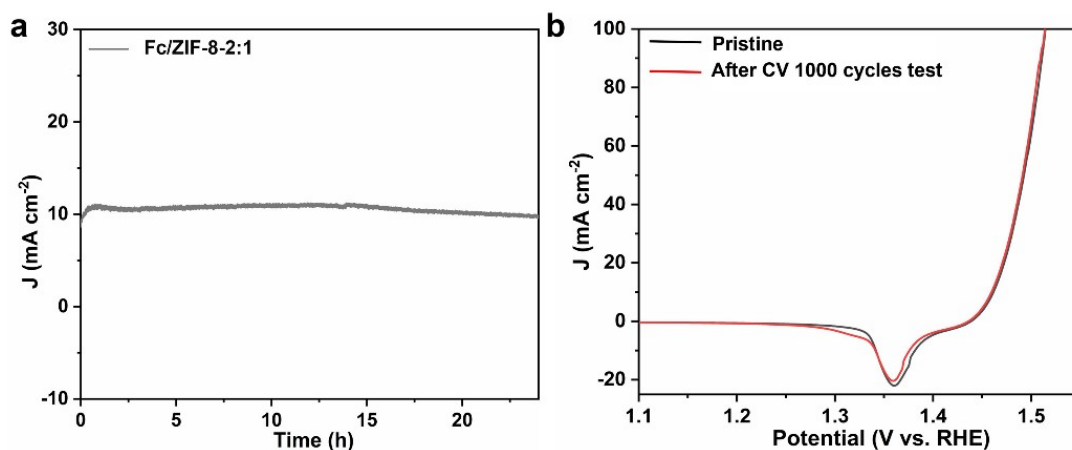

**Fig. S19** The chronoamperometry curve at  $10 \text{ mA cm}^{-2}$  of Fc/ZIF-8-2:1 (a), and LSV curves of Fc/ZIF-8-2:1 before and after 1000 CV cycles (b).

### Supplementary References

1. L. Zhong, X. Wang, Y. Guo, J. Ding, Q. Huang, T.-T. Li, Y. Hu, J. Qian and S. Huang, Differentiated oxygen evolution behavior in MOF-derived oxide nanomaterials induced by phase transition, *ACS Appl. Mater. Interfaces*, 2021, **13**, 55454-55462.
2. F.-L. Li, P. Wang, X. Huang, D. J. Young, H.-F. Wang, P. Braunstein and J.-P. Lang, Large-scale, bottom-up synthesis of binary metal-organic framework nanosheets for efficient water oxidation, *Angew. Chem. Int. Ed.*, 2019, **58**, 7051-7056.
3. J. Ma, S. Wang, W. He, H. Chen, X. Zhai, F. Meng and Y. Fu, Synthesis of FeNiCo ternary hydroxides through green grinding method with metal-organic frameworks as precursors for oxygen evolution reaction, *ChemSusChem*, 2021, **14**, 5042-5048.
4. C. Pan, Z. Liu and M. Huang, 2D iron-doped nickel MOF nanosheets grown on nickel foam for highly efficient oxygen evolution reaction, *Appl. Surf. Sci.*, 2020, **529**, 147201-147207.
5. D. Xing, Y. Wang, P. Zhou, Y. Liu, Z. Wang, P. Wang, Z. Zheng, H. Cheng, Y. Dai and B. Huang,  $\text{Co}_3(\text{hexaiminotriphenylene})_2$ : a conductive two-dimensional  $\pi$ -d

- conjugated metal-organic framework for highly efficient oxygen evolution reaction, *Appl. Catal. B: Environ.*, 2020, **278**, 119295-119303.
6. Y. Guo, J. Tang, Z. Wang, Y. Sugahara and Y. Yamauchi, Hollow porous heterometallic phosphide nanocubes for enhanced electrochemical water splitting, *Small*, 2018, **14**, 1802442-1802449.
7. M. Liu, L. Kong, X. Wang, J. He, J. Zhang, J. Zhu and X.-H. Bu, Deciphering of advantageous electrocatalytic water oxidation behavior of metal-organic framework in alkaline media, *Nano Res.*, 2021, **14**, 4680-4688.
8. W. Cheng, X. F. Lu, D. Luan and X. W. Lou, NiMn-based bimetal-organic framework nanosheets supported on multi-channel carbon fibers for efficient oxygen electrocatalysis, *Angew. Chem. Int. Ed.*, 2020, **59**, 18234-18239.
9. X. Zhang, J. Luo, K. Wan, D. Plessers, B. Sels, J. Song, L. Chen, T. Zhang, P. Tang, J. R. Morante, J. Arbiol and J. Fransaer, From rational design of a new bimetallic MOF family with tunable linkers to OER catalysts, *J. Mater. Chem. A*, 2019, **7**, 1616-1628.
10. W. Cheng, Z.-P. Wu, D. Luan, S.-Q. Zang and X. W. Lou, Synergetic cobalt-copper-based bimetal-organic framework nanoboxes toward efficient electrochemical oxygen evolution, *Angew. Chem. Int. Ed.*, 2021, **60**, 26397-26402.
11. W. Chen, Y. Zhang, R. Huang, Y. Zhou, Y. Wu, Y. Hu and K. Ostrikov, Ni-Co hydroxide nanosheets on plasma-reduced Co-based metal-organic nanocages for electrocatalytic water oxidation, *J. Mater. Chem. A*, 2019, **7**, 4950-4959.
12. J. Gao, J. Cong, Y. Wu, L. Sun, J. Yao and B. Chen, Bimetallic hofmann-type metal-organic framework nanoparticles for efficient electrocatalysis of oxygen evolution reaction, *ACS Appl. Energy Mater.*, 2018, **1**, 5140-5144.
13. J. Kang, M. J. Lee, N. G. Oh, J. Shin, S. J. Kwon, H. Chun, S.-J. Kim, H. Yun, H. Jo, K. M. Ok, and J. Do, I<sup>3</sup>O<sup>0</sup>-Type 3D Framework of Cobalt Cinnamate and Its Efficient Electrocatalytic Activity toward the Oxygen Evolution Reaction, *Chem. Mater.*, 2021, **33**, 2804-2813.
14. Y. Xu, W. Tu, B. Zhang, S. Yin, Y. Huang, M. Kraft, and R. Xu, Nickel Nanoparticles Encapsulated in Few-Layer Nitrogen-Doped Graphene Derived from

Metal-Organic Frameworks as Efficient Bifunctional Electrocatalysts for Overall Water Splitting, *Adv. Mater.*, 2017, **29**, 1605957.

15 J. Liang, X. Gao, B. Guo, Y. Ding, J. Yan, Z. Guo, E. C. M. Tse, and J. Liu, Ferrocene-Based Metal-Organic Framework Nanosheets as a Robust Oxygen Evolution Catalyst, *Angew. Chem. Int. Ed.*, 2021, **60**, 12770-12774.

16 Q. Zhang, Y. Wang, Y. Wang, S. Yang, X. Wu, B. Lv, N. Wang, Y. Gao, X. Xu, H. Lei, R. Cao, Electropolymerization of cobalt porphyrins and corroles for the oxygen evolution reaction, *Chin. Chem. Lett.*, 2021, **32**, 3807-3810.

17 H. Qin, Y. Wang, B. Wang, X. Duan, H. Lei, X. Zhang, H. Zheng, W. Zhang, R. Cao, Cobalt porphyrins supported on carbon nanotubes as model catalysts of metal-N<sub>4</sub>/C sites for oxygen electrocatalysis, *J. Energy Chem.*, 2021, **53**, 77-81.
